# Supplementary material
Source: PubMed Central journal article supplement (PMC4216260)
Supplement: supp_141125_five-phe-1-at.pdf [file supp_141125_five-phe-1-at.pdf]

## **Appendix 1: Resources for physicians**

- Canadian Task Force on Preventive Health Care: <http://canadiantaskforce.ca>
- Choosing Wisely Canada: [choosingwiselycanada.org](http://choosingwiselycanada.org)
- College of Family Physicians of Canada guide to the periodic health examination: [www.cfpc.ca/ProjectAssets/Templates/Resource.aspx?id=777&langType=4105](http://www.cfpc.ca/ProjectAssets/Templates/Resource.aspx?id=777&langType=4105)
- National Institute for Health and Care Excellence: [www.nice.org.uk](http://www.nice.org.uk)
- US Preventive Services Task Force: [www.uspreventiveservicestaskforce.org](http://www.uspreventiveservicestaskforce.org)
