# Supplementary material
Source: PubMed Central journal article supplement (PMC4216260)
Supplement: supp_141125_five-phe-2-at.pdf [file supp_141125_five-phe-2-at.pdf]

## Appendix 2: References

1. The College of Physicians and Surgeons of Canada. *Annual physical examination practices by province/territory in Canada*. Mississauga (ON): The College; 2013. Available: [www.cfpc.ca/uploadedFiles/Health\\_Policy/CFPC\\_Policy\\_Papers\\_and\\_Endorsements/CFPC\\_Policy\\_Papers/CFPC\\_PT\\_Annual\\_Exam.pdf](http://www.cfpc.ca/uploadedFiles/Health_Policy/CFPC_Policy_Papers_and_Endorsements/CFPC_Policy_Papers/CFPC_PT_Annual_Exam.pdf) (accessed 2014 Sept. 13).
2. Goodyear-Smith F. Government's plans for universal health checks for people aged 40-75. *BMJ* 2013;347:f4788.
3. Duerksen A, Dubey V, Iglar K. Annual adult health checkup: update on the Preventive Care Checklist Form. *Can Fam Physician* 2012;58:43-7.
4. Kermott CA, Kuhl CS, Faubion SS, et al. The diagnostic yield of the first episode of a periodic health evaluation: a descriptive epidemiology study. *BMC Health Serv Res* 2012;12:137.
5. Krogsbøll LT, Jørgensen KJ, Grønhøj Larsen C, et al. General health checks in adults for reducing morbidity and mortality from disease. *Cochrane Database Syst Rev* 2012;10:CD009009.
6. CMA's Forum on General and Family Practice Issues and College of Family Physicians of Canada: Five Things physicians and patients should question. In: *Choosing Wisely Canada* [website]. Available: [www.choosingwiselycanada.org/recommendations/cmas-forum-on-general-and-family-practice-issues-and-college-of-family-physicians-of-canada](http://www.choosingwiselycanada.org/recommendations/cmas-forum-on-general-and-family-practice-issues-and-college-of-family-physicians-of-canada) (accessed 2014 Sept. 2).
7. Kelley JM, Kraft-Todd G, Schapira L, et al. The influence of the patient-clinician relationship on healthcare outcomes: a systematic review and meta-analysis of randomized controlled trials. *PLoS One* 2014;9:e94207.
